# Supplementary material
Source: publisher figshare collection journal article supplement (https://sage.figshare.com/ndownloader/files/13365659)
Supplement: Supplementary file 1 [file 13365659]

## Appendix

### Plots of mean ratings for subcategories:

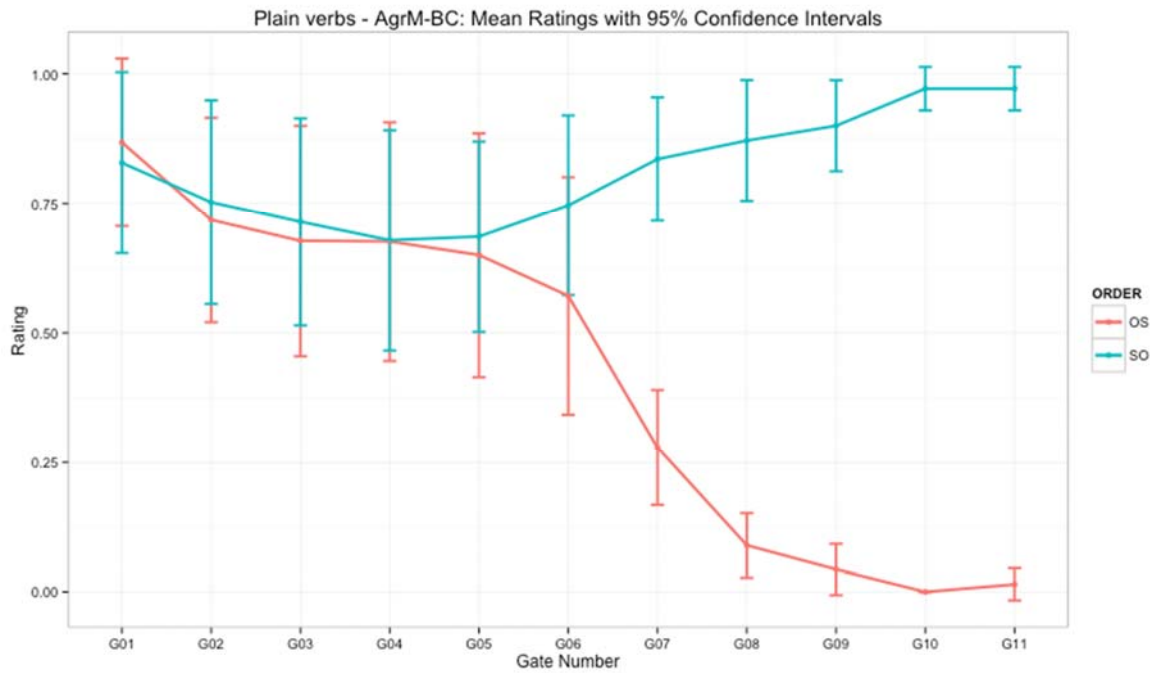

Figure A.1. Comparison of SOV and OSV orders for the subcategory plain verbs - AgrM-BC. Gate numbers are given on the x-axis; mean ratings, that is the proportion of sentences interpreted as SO are presented on the y-axis. The relevant gate appeared at gate 7.

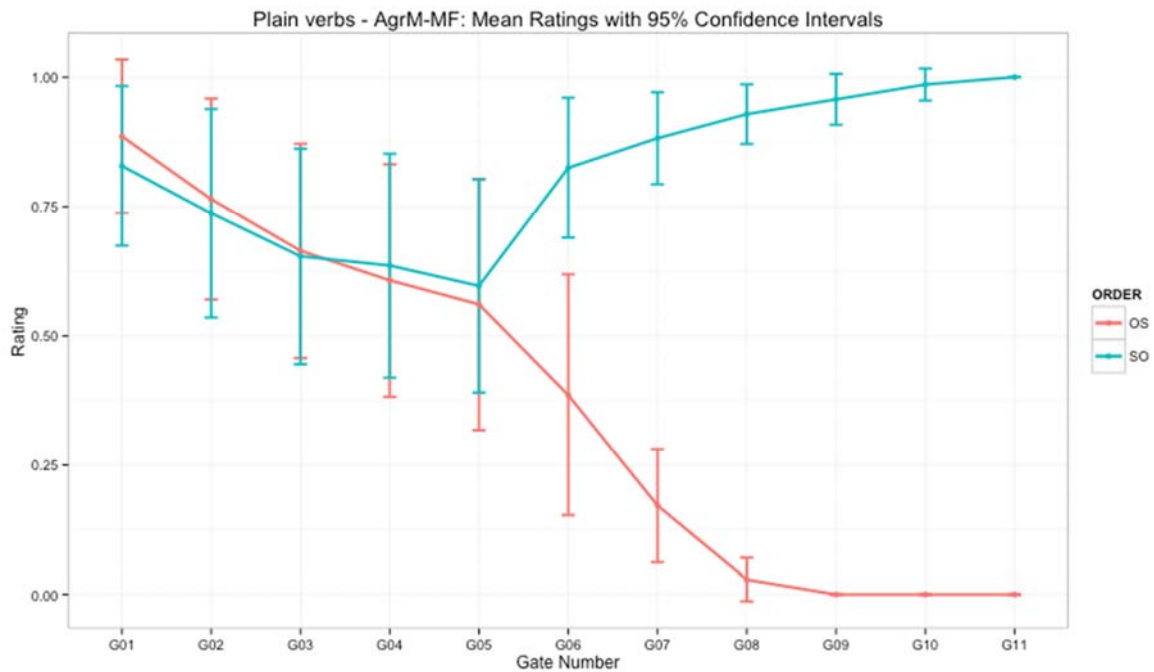

Figure A.2. Comparison of SOV and OSV orders for the subcategory plain verbs - AgrM-MF. Gate numbers are given on the x-axis; mean ratings, that is the proportion of sentences interpreted as SO are presented on the y-axis. The relevant gate appeared at gate 6.

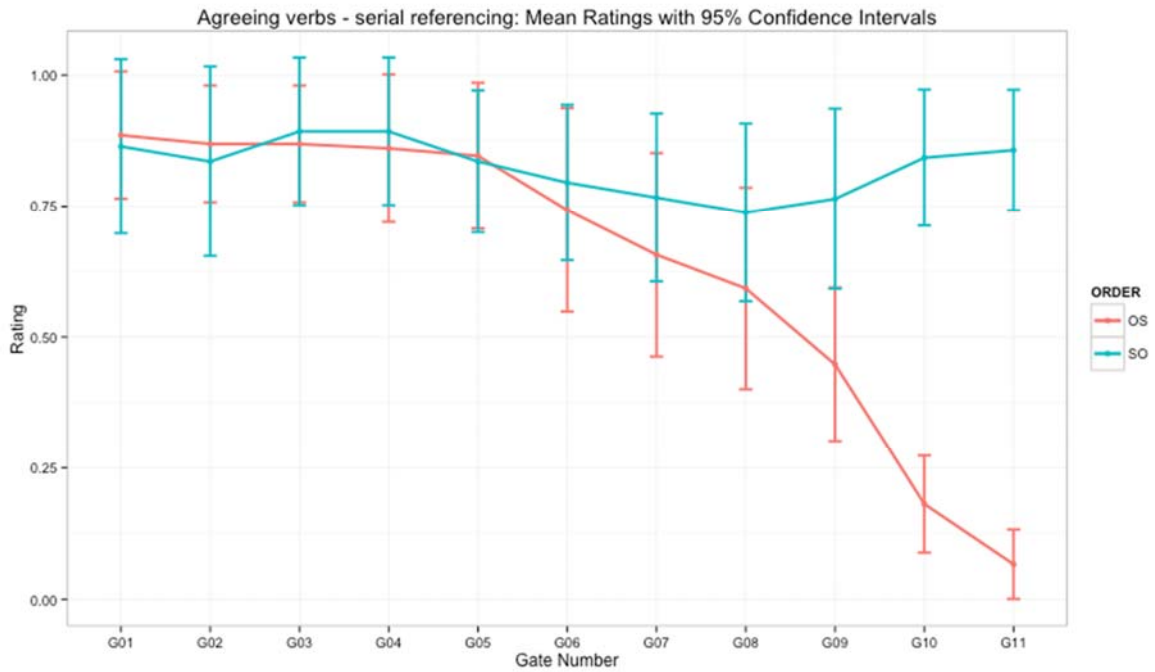

Figure A.3. Comparison of SOV and OSV orders for the subcategory agreeing verbs - serial referencing. Gate numbers are given on the x-axis; mean ratings, that is the proportion of sentences interpreted as SO are presented on the y-axis. The relevant gate appeared at gate 9.

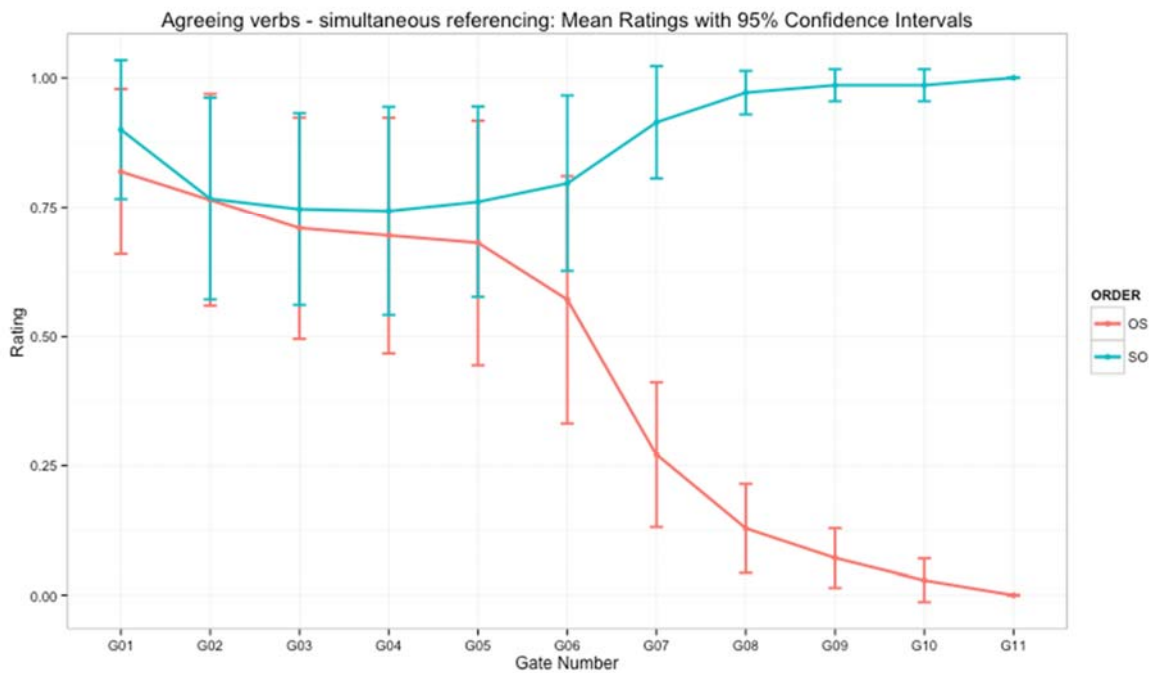

Figure A.4. Comparison of SOV and OSV orders for the subcategory agreeing verbs - simultaneous referencing. Gate numbers are given on the x-axis; mean ratings, that is the proportion of sentences interpreted as SO are presented on the y-axis. The relevant gate appeared at gate 7.

#
